# Supplementary material
Source: Springer Nature journal article supplement (https://www.springermedizin.de/resource/supplementary/12906_2013_2107_MOESM6_ESM.pdf/9523804)

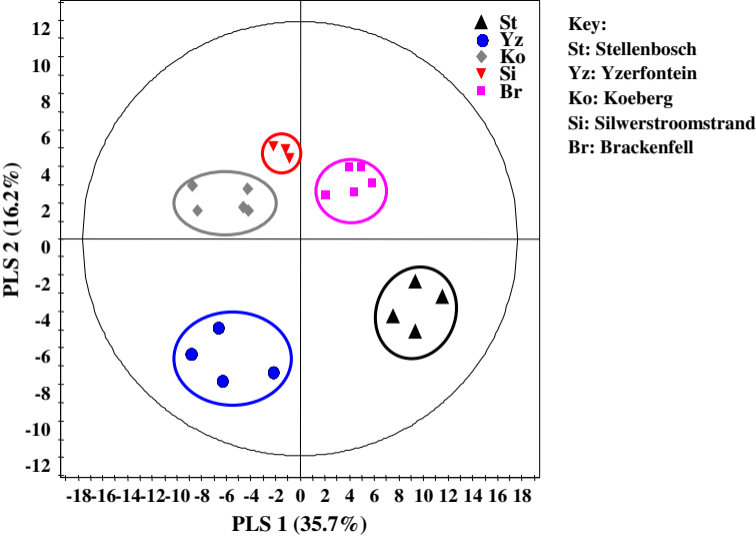

Supplement: MOESM6 [file 9523804]
